# Supplementary material
Source: publisher figshare collection journal article supplement (https://acs.figshare.com/ndownloader/files/4743727)
Supplement: Supplementary file 1 [file 4743727]

  
data_cd2624 
  
_audit_creation_method            SHELXL-97 
_chemical_name_systematic 
; 
 ? 
; 
_chemical_name_common             ? 
_chemical_melting_point           ? 
_chemical_formula_moiety          ? 
_chemical_formula_sum 
 'C22 H18 F6 N4 O8 Pd2 S2' 
_chemical_formula_weight          857.32 
  
loop_ 
 _atom_type_symbol 
 _atom_type_description 
 _atom_type_scat_dispersion_real 
 _atom_type_scat_dispersion_imag 
 _atom_type_scat_source 
 'C'  'C'   0.0033   0.0016 
 'International Tables Vol C Tables 4.2.6.8 and 6.1.1.4' 
 'H'  'H'   0.0000   0.0000 
 'International Tables Vol C Tables 4.2.6.8 and 6.1.1.4' 
 'N'  'N'   0.0061   0.0033 
 'International Tables Vol C Tables 4.2.6.8 and 6.1.1.4' 
 'O'  'O'   0.0106   0.0060 
 'International Tables Vol C Tables 4.2.6.8 and 6.1.1.4' 
 'S'  'S'   0.1246   0.1234 
 'International Tables Vol C Tables 4.2.6.8 and 6.1.1.4' 
 'F'  'F'   0.0171   0.0103 
 'International Tables Vol C Tables 4.2.6.8 and 6.1.1.4' 
 'Pd'  'Pd'  -0.9988   1.0072 
 'International Tables Vol C Tables 4.2.6.8 and 6.1.1.4' 
  
_symmetry_cell_setting            Triclinic 
_symmetry_space_group_name_H-M    P-1 
  
loop_ 
 _symmetry_equiv_pos_as_xyz 
 'x, y, z' 
 '-x, -y, -z' 
  
_cell_length_a                    7.7003(9) 
_cell_length_b                    12.9161(15) 
_cell_length_c                    14.7630(17) 
_cell_angle_alpha                 87.536(2) 
_cell_angle_beta                  84.658(2) 
_cell_angle_gamma                 74.544(2) 
_cell_volume                      1408.8(3) 
_cell_formula_units_Z             2 
_cell_measurement_temperature     293(2) 
_cell_measurement_reflns_used     2558 
_cell_measurement_theta_min       4.328 
_cell_measurement_theta_max       50.341 
  
_exptl_crystal_description        prismatic 
_exptl_crystal_colour             yellow 
_exptl_crystal_size_max           0.508 
_exptl_crystal_size_mid           0.172 
_exptl_crystal_size_min           0.114 
_exptl_crystal_density_meas       ? 
_exptl_crystal_density_diffrn     2.021 
_exptl_crystal_density_method     'not measured' 
_exptl_crystal_F_000              840 
_exptl_absorpt_coefficient_mu     1.518 
_exptl_absorpt_correction_type    empirical 
_exptl_absorpt_correction_T_min   0.56427 
_exptl_absorpt_correction_T_max   1.00000 
_exptl_absorpt_process_details    ? 
  
_exptl_special_details 
; 
 ? 
; 
  
_diffrn_ambient_temperature       293(2) 
_diffrn_radiation_wavelength      0.71073 
_diffrn_radiation_type            MoK\a 
_diffrn_radiation_source          'fine-focus sealed tube' 
_diffrn_radiation_monochromator   graphite 
_diffrn_measurement_device_type   'CCD area detector' 
_diffrn_measurement_method        'phi and omega scans' 
_diffrn_detector_area_resol_mean  ? 
_diffrn_standards_number          ? 
_diffrn_standards_interval_count  ? 
_diffrn_standards_interval_time   ? 
_diffrn_standards_decay_%         ? 
_diffrn_reflns_number             8380 
_diffrn_reflns_av_R_equivalents   0.0963 
_diffrn_reflns_av_sigmaI/netI     0.1018 
_diffrn_reflns_limit_h_min        -9 
_diffrn_reflns_limit_h_max        8 
_diffrn_reflns_limit_k_min        -15 
_diffrn_reflns_limit_k_max        16 
_diffrn_reflns_limit_l_min        -18 
_diffrn_reflns_limit_l_max        18 
_diffrn_reflns_theta_min          1.64 
_diffrn_reflns_theta_max          27.00 
_reflns_number_total              5978 
_reflns_number_gt                 4199 
_reflns_threshold_expression      >2sigma(I) 
  
_computing_data_collection        'Bruker SMART' 
_computing_cell_refinement        'Bruker SMART' 
_computing_data_reduction         'Bruker SHELXTL' 
_computing_structure_solution     'SHELXS-97 (Sheldrick, 1990)' 
_computing_structure_refinement   'SHELXL-97 (Sheldrick, 1997)' 
_computing_molecular_graphics     'Bruker SHELXTL' 
_computing_publication_material   'Bruker SHELXTL' 
  
_refine_special_details 
; 
 Refinement of F^2^ against ALL reflections.  The weighted R-factor wR and 
 goodness of fit S are based on F^2^, conventional R-factors R are based 
 on F, with F set to zero for negative F^2^. The threshold expression of 
 F^2^ > 2sigma(F^2^) is used only for calculating R-factors(gt) etc. and is 
 not relevant to the choice of reflections for refinement.  R-factors based 
 on F^2^ are statistically about twice as large as those based on F, and R- 
 factors based on ALL data will be even larger. 
; 
  
_refine_ls_structure_factor_coef  Fsqd 
_refine_ls_matrix_type            full 
_refine_ls_weighting_scheme       calc 
_refine_ls_weighting_details 
 'calc w=1/[\s^2^(Fo^2^)+(0.0504P)^2^+0.0000P] where P=(Fo^2^+2Fc^2^)/3' 
_atom_sites_solution_primary      direct 
_atom_sites_solution_secondary    difmap 
_atom_sites_solution_hydrogens    geom 
_refine_ls_hydrogen_treatment     mixed 
_refine_ls_extinction_method      none 
_refine_ls_extinction_coef        ? 
_refine_ls_number_reflns          5978 
_refine_ls_number_parameters      405 
_refine_ls_number_restraints      0 
_refine_ls_R_factor_all           0.0716 
_refine_ls_R_factor_gt            0.0526 
_refine_ls_wR_factor_ref          0.1255 
_refine_ls_wR_factor_gt           0.1180 
_refine_ls_goodness_of_fit_ref    0.910 
_refine_ls_restrained_S_all       0.910 
_refine_ls_shift/su_max           0.002 
_refine_ls_shift/su_mean          0.000 
  
loop_ 
 _atom_site_label 
 _atom_site_type_symbol 
 _atom_site_fract_x 
 _atom_site_fract_y 
 _atom_site_fract_z 
 _atom_site_U_iso_or_equiv 
 _atom_site_adp_type 
 _atom_site_occupancy 
 _atom_site_symmetry_multiplicity 
 _atom_site_calc_flag 
 _atom_site_refinement_flags 
 _atom_site_disorder_assembly 
 _atom_site_disorder_group 
Pd1 Pd 0.27943(5) 0.50630(3) 1.02901(3) 0.03370(14) Uani 1 1 d . . . 
Pd2 Pd 0.06275(5) 0.61361(3) 0.86920(3) 0.03530(14) Uani 1 1 d . . . 
S1 S 0.2077(2) 0.15545(13) 0.86020(11) 0.0553(4) Uani 1 1 d . . . 
S2 S 0.7189(3) 0.27005(17) 0.46705(12) 0.0676(5) Uani 1 1 d . . . 
O1 O 0.2122(6) 0.4679(3) 0.9083(3) 0.0420(10) Uani 1 1 d . . . 
O2 O 0.1489(6) 0.6542(3) 0.9843(3) 0.0423(10) Uani 1 1 d . . . 
O3 O 0.1267(6) 0.2688(3) 0.8798(3) 0.0579(12) Uani 1 1 d . . . 
O4 O 0.3979(7) 0.1216(5) 0.8669(4) 0.108(2) Uani 1 1 d . . . 
O5 O 0.1060(10) 0.0885(5) 0.9016(4) 0.109(2) Uani 1 1 d . . . 
O6 O 0.8401(11) 0.2788(8) 0.5299(5) 0.148(3) Uani 1 1 d . . . 
O7 O 0.5377(8) 0.3294(6) 0.4867(4) 0.124(3) Uani 1 1 d . . . 
O8 O 0.7804(8) 0.2716(6) 0.3741(4) 0.103(2) Uani 1 1 d . . . 
N1 N 0.4173(6) 0.3621(4) 1.0725(3) 0.0393(11) Uani 1 1 d . . . 
N2 N 0.3576(6) 0.5498(4) 1.1427(3) 0.0390(11) Uani 1 1 d . . . 
N3 N -0.0170(6) 0.5768(4) 0.7528(3) 0.0401(11) Uani 1 1 d . . . 
N4 N -0.0662(6) 0.7606(4) 0.8279(3) 0.0427(11) Uani 1 1 d . . . 
F1 F 0.2608(8) 0.0502(4) 0.7108(3) 0.1116(19) Uani 1 1 d . . . 
F2 F 0.0176(8) 0.1749(5) 0.7217(4) 0.123(2) Uani 1 1 d . . . 
F3 F 0.2636(9) 0.2138(5) 0.6927(3) 0.123(2) Uani 1 1 d . . . 
F4 F 0.6585(16) 0.1195(8) 0.5714(6) 0.155(6) Uani 1 1 d . . . 
F5 F 0.8421(14) 0.0634(6) 0.4630(7) 0.150(5) Uani 1 1 d . . . 
F6 F 0.5751(10) 0.1211(6) 0.4308(6) 0.178(3) Uani 1 1 d . . . 
C1 C 0.4448(8) 0.2694(5) 1.0283(4) 0.0447(14) Uani 1 1 d . . . 
H1 H 0.3967 0.2703 0.9727 0.054 Uiso 1 1 calc R . . 
C2 C 0.5405(8) 0.1750(5) 1.0630(5) 0.0553(17) Uani 1 1 d . . . 
H2 H 0.5603 0.1121 1.0306 0.066 Uiso 1 1 calc R . . 
C3 C 0.6087(8) 0.1724(5) 1.1466(5) 0.0558(17) Uani 1 1 d . . . 
H3 H 0.6717 0.1077 1.1719 0.067 Uiso 1 1 calc R . . 
C4 C 0.5818(8) 0.2677(5) 1.1919(4) 0.0482(15) Uani 1 1 d . . . 
H4 H 0.6280 0.2679 1.2479 0.058 Uiso 1 1 calc R . . 
C5 C 0.4872(7) 0.3611(5) 1.1539(4) 0.0374(13) Uani 1 1 d . . . 
C6 C 0.4536(7) 0.4684(5) 1.1923(4) 0.0368(13) Uani 1 1 d . . . 
C7 C 0.5179(8) 0.4875(6) 1.2727(4) 0.0482(15) Uani 1 1 d . . . 
H7 H 0.5829 0.4305 1.3068 0.058 Uiso 1 1 calc R . . 
C8 C 0.4851(9) 0.5909(6) 1.3017(4) 0.0557(17) Uani 1 1 d . . . 
H8 H 0.5268 0.6047 1.3559 0.067 Uiso 1 1 calc R . . 
C9 C 0.3900(9) 0.6737(6) 1.2499(4) 0.0588(18) Uani 1 1 d . . . 
H9 H 0.3684 0.7445 1.2679 0.071 Uiso 1 1 calc R . . 
C10 C 0.3270(8) 0.6508(5) 1.1711(4) 0.0475(15) Uani 1 1 d . . . 
H10 H 0.2613 0.7070 1.1365 0.057 Uiso 1 1 calc R . . 
C11 C 0.0181(8) 0.4776(5) 0.7190(4) 0.0469(15) Uani 1 1 d . . . 
H11 H 0.0906 0.4203 0.7498 0.056 Uiso 1 1 calc R . . 
C12 C -0.0491(8) 0.4584(6) 0.6411(4) 0.0528(16) Uani 1 1 d . . . 
H12 H -0.0249 0.3889 0.6197 0.063 Uiso 1 1 calc R . . 
C13 C -0.1534(9) 0.5437(6) 0.5948(4) 0.0548(17) Uani 1 1 d . . . 
H13 H -0.2023 0.5325 0.5419 0.066 Uiso 1 1 calc R . . 
C14 C -0.1842(8) 0.6443(6) 0.6270(4) 0.0527(16) Uani 1 1 d . . . 
H14 H -0.2521 0.7024 0.5951 0.063 Uiso 1 1 calc R . . 
C15 C -0.1159(7) 0.6615(5) 0.7066(4) 0.0389(13) Uani 1 1 d . . . 
C16 C -0.1391(7) 0.7668(5) 0.7474(4) 0.0421(14) Uani 1 1 d . . . 
C17 C -0.2258(9) 0.8642(5) 0.7113(5) 0.0570(17) Uani 1 1 d . . . 
H17 H -0.2744 0.8677 0.6555 0.068 Uiso 1 1 calc R . . 
C18 C -0.2411(10) 0.9561(6) 0.7571(5) 0.068(2) Uani 1 1 d . . . 
H18 H -0.3019 1.0224 0.7337 0.082 Uiso 1 1 calc R . . 
C19 C -0.1646(9) 0.9490(5) 0.8389(5) 0.0610(18) Uani 1 1 d . . . 
H19 H -0.1725 1.0111 0.8706 0.073 Uiso 1 1 calc R . . 
C20 C -0.0781(8) 0.8519(5) 0.8732(4) 0.0508(16) Uani 1 1 d . . . 
H20 H -0.0265 0.8478 0.9282 0.061 Uiso 1 1 calc R . . 
C21 C 0.1865(12) 0.1467(6) 0.7402(5) 0.068(2) Uani 1 1 d . . . 
C22 C 0.7024(19) 0.1334(11) 0.4847(9) 0.125(4) Uani 1 1 d . . . 
H5 H 0.056(8) 0.670(6) 1.017(4) 0.06(2) Uiso 1 1 d . . . 
H6 H 0.153(8) 0.428(5) 0.938(4) 0.05(2) Uiso 1 1 d . . . 
  
loop_ 
 _atom_site_aniso_label 
 _atom_site_aniso_U_11 
 _atom_site_aniso_U_22 
 _atom_site_aniso_U_33 
 _atom_site_aniso_U_23 
 _atom_site_aniso_U_13 
 _atom_site_aniso_U_12 
Pd1 0.0363(3) 0.0311(2) 0.0295(2) -0.00196(17) 0.00055(18) -0.00244(18) 
Pd2 0.0383(3) 0.0330(2) 0.0298(2) -0.00032(17) 0.00033(18) -0.00230(19) 
S1 0.0730(12) 0.0379(9) 0.0493(9) -0.0127(7) -0.0077(8) -0.0022(8) 
S2 0.0827(14) 0.0701(13) 0.0462(10) -0.0044(9) -0.0157(9) -0.0095(11) 
O1 0.047(2) 0.041(2) 0.037(2) 0.0007(18) -0.0109(19) -0.005(2) 
O2 0.048(3) 0.033(2) 0.040(2) -0.0027(18) -0.008(2) 0.0014(19) 
O3 0.067(3) 0.037(2) 0.061(3) -0.018(2) 0.001(2) 0.001(2) 
O4 0.085(4) 0.105(5) 0.109(5) -0.053(4) -0.045(3) 0.040(3) 
O5 0.189(7) 0.081(4) 0.071(4) -0.006(3) 0.016(4) -0.070(5) 
O6 0.165(7) 0.213(9) 0.101(5) -0.019(6) -0.055(5) -0.093(7) 
O7 0.109(5) 0.128(6) 0.098(5) -0.028(4) -0.014(4) 0.036(4) 
O8 0.108(4) 0.147(7) 0.053(3) 0.020(4) -0.002(3) -0.033(4) 
N1 0.031(2) 0.041(3) 0.042(3) -0.006(2) -0.002(2) -0.002(2) 
N2 0.039(3) 0.038(3) 0.038(3) -0.004(2) -0.004(2) -0.006(2) 
N3 0.037(3) 0.038(3) 0.042(3) 0.000(2) -0.002(2) -0.005(2) 
N4 0.039(3) 0.045(3) 0.037(3) -0.002(2) 0.000(2) 0.000(2) 
F1 0.189(5) 0.060(3) 0.061(3) -0.029(2) -0.023(3) 0.018(3) 
F2 0.112(4) 0.147(6) 0.094(4) -0.029(4) -0.052(3) 0.013(4) 
F3 0.192(6) 0.092(4) 0.075(3) -0.003(3) 0.035(4) -0.036(4) 
F4 0.431(16) 0.201(10) 0.143(8) 0.096(7) -0.001(9) -0.127(11) 
F5 0.252(9) 0.085(5) 0.271(11) -0.040(6) -0.095(8) 0.079(6) 
F6 0.175(7) 0.143(7) 0.237(9) -0.016(6) -0.055(6) -0.063(6) 
C1 0.045(3) 0.038(3) 0.050(4) -0.006(3) -0.003(3) -0.008(3) 
C2 0.051(4) 0.037(4) 0.073(5) -0.009(3) 0.000(3) -0.003(3) 
C3 0.051(4) 0.043(4) 0.064(4) 0.009(3) 0.000(3) 0.001(3) 
C4 0.050(4) 0.055(4) 0.035(3) 0.009(3) -0.003(3) -0.007(3) 
C5 0.032(3) 0.042(3) 0.033(3) 0.002(2) 0.006(2) -0.005(3) 
C6 0.032(3) 0.039(3) 0.038(3) 0.004(2) 0.002(2) -0.009(3) 
C7 0.044(3) 0.062(4) 0.036(3) 0.000(3) -0.004(3) -0.009(3) 
C8 0.061(4) 0.068(5) 0.038(3) -0.009(3) -0.003(3) -0.016(4) 
C9 0.066(4) 0.053(4) 0.057(4) -0.017(3) -0.007(3) -0.012(4) 
C10 0.054(4) 0.042(4) 0.044(3) -0.007(3) -0.004(3) -0.008(3) 
C11 0.053(4) 0.044(4) 0.041(3) -0.002(3) -0.001(3) -0.009(3) 
C12 0.055(4) 0.058(4) 0.042(3) -0.010(3) 0.002(3) -0.010(3) 
C13 0.057(4) 0.071(5) 0.037(3) -0.007(3) -0.003(3) -0.017(4) 
C14 0.047(4) 0.064(5) 0.041(3) 0.005(3) -0.007(3) -0.003(3) 
C15 0.035(3) 0.041(3) 0.036(3) 0.006(2) 0.000(2) -0.006(3) 
C16 0.032(3) 0.049(4) 0.041(3) 0.002(3) 0.002(2) -0.005(3) 
C17 0.065(4) 0.045(4) 0.057(4) 0.010(3) -0.014(3) -0.006(3) 
C18 0.075(5) 0.045(4) 0.080(5) 0.014(4) -0.018(4) -0.007(4) 
C19 0.068(5) 0.035(4) 0.079(5) -0.003(3) -0.005(4) -0.011(3) 
C20 0.053(4) 0.041(4) 0.056(4) -0.004(3) -0.004(3) -0.008(3) 
C21 0.094(6) 0.051(4) 0.051(4) -0.012(3) -0.007(4) -0.001(4) 
C22 0.147(11) 0.126(11) 0.105(9) 0.007(8) -0.039(8) -0.035(9) 
  
_geom_special_details 
; 
 All esds (except the esd in the dihedral angle between two l.s. planes) 
 are estimated using the full covariance matrix.  The cell esds are taken 
 into account individually in the estimation of esds in distances, angles 
 and torsion angles; correlations between esds in cell parameters are only 
 used when they are defined by crystal symmetry.  An approximate (isotropic) 
 treatment of cell esds is used for estimating esds involving l.s. planes. 
; 
  
loop_ 
 _geom_bond_atom_site_label_1 
 _geom_bond_atom_site_label_2 
 _geom_bond_distance 
 _geom_bond_site_symmetry_2 
 _geom_bond_publ_flag 
Pd1 N2 1.986(4) . ? 
Pd1 N1 1.994(5) . ? 
Pd1 O1 2.019(4) . ? 
Pd1 O2 2.022(4) . ? 
Pd1 Pd2 3.0807(6) . ? 
Pd1 H6 2.16(6) . ? 
Pd2 N4 1.992(5) . ? 
Pd2 N3 1.995(5) . ? 
Pd2 O2 2.018(4) . ? 
Pd2 O1 2.018(4) . ? 
S1 O5 1.401(5) . ? 
S1 O4 1.424(5) . ? 
S1 O3 1.461(4) . ? 
S1 C21 1.806(7) . ? 
S2 O6 1.404(6) . ? 
S2 O8 1.410(5) . ? 
S2 O7 1.411(6) . ? 
S2 C22 1.810(14) . ? 
O1 H6 0.85(6) . ? 
O2 H5 0.81(6) . ? 
N1 C1 1.346(7) . ? 
N1 C5 1.360(7) . ? 
N2 C10 1.341(7) . ? 
N2 C6 1.345(7) . ? 
N3 C11 1.345(7) . ? 
N3 C15 1.353(7) . ? 
N4 C16 1.351(7) . ? 
N4 C20 1.360(8) . ? 
F1 C21 1.299(8) . ? 
F2 C21 1.305(9) . ? 
F3 C21 1.319(9) . ? 
F4 C22 1.310(13) . ? 
F5 C22 1.233(13) . ? 
F6 C22 1.363(12) . ? 
C1 C2 1.353(9) . ? 
C1 H1 0.9300 . ? 
C2 C3 1.382(9) . ? 
C2 H2 0.9300 . ? 
C3 C4 1.384(9) . ? 
C3 H3 0.9300 . ? 
C4 C5 1.360(8) . ? 
C4 H4 0.9300 . ? 
C5 C6 1.469(8) . ? 
C6 C7 1.383(8) . ? 
C7 C8 1.371(9) . ? 
C7 H7 0.9300 . ? 
C8 C9 1.372(9) . ? 
C8 H8 0.9300 . ? 
C9 C10 1.373(8) . ? 
C9 H9 0.9300 . ? 
C10 H10 0.9300 . ? 
C11 C12 1.362(8) . ? 
C11 H11 0.9300 . ? 
C12 C13 1.376(9) . ? 
C12 H12 0.9300 . ? 
C13 C14 1.356(9) . ? 
C13 H13 0.9300 . ? 
C14 C15 1.381(8) . ? 
C14 H14 0.9300 . ? 
C15 C16 1.471(8) . ? 
C16 C17 1.368(8) . ? 
C17 C18 1.364(9) . ? 
C17 H17 0.9300 . ? 
C18 C19 1.381(9) . ? 
C18 H18 0.9300 . ? 
C19 C20 1.354(9) . ? 
C19 H19 0.9300 . ? 
C20 H20 0.9300 . ? 
  
loop_ 
 _geom_angle_atom_site_label_1 
 _geom_angle_atom_site_label_2 
 _geom_angle_atom_site_label_3 
 _geom_angle 
 _geom_angle_site_symmetry_1 
 _geom_angle_site_symmetry_3 
 _geom_angle_publ_flag 
N2 Pd1 N1 81.09(19) . . ? 
N2 Pd1 O1 175.77(19) . . ? 
N1 Pd1 O1 100.48(18) . . ? 
N2 Pd1 O2 97.96(18) . . ? 
N1 Pd1 O2 177.74(18) . . ? 
O1 Pd1 O2 80.33(16) . . ? 
N2 Pd1 Pd2 138.22(14) . . ? 
N1 Pd1 Pd2 140.68(13) . . ? 
O1 Pd1 Pd2 40.26(12) . . ? 
O2 Pd1 Pd2 40.27(11) . . ? 
N2 Pd1 H6 160.9(17) . . ? 
N1 Pd1 H6 89.1(18) . . ? 
O1 Pd1 H6 23.3(16) . . ? 
O2 Pd1 H6 92.4(18) . . ? 
Pd2 Pd1 H6 53.8(18) . . ? 
N4 Pd2 N3 80.78(19) . . ? 
N4 Pd2 O2 98.19(18) . . ? 
N3 Pd2 O2 177.86(18) . . ? 
N4 Pd2 O1 175.40(18) . . ? 
N3 Pd2 O1 100.44(18) . . ? 
O2 Pd2 O1 80.43(16) . . ? 
N4 Pd2 Pd1 138.55(14) . . ? 
N3 Pd2 Pd1 140.65(14) . . ? 
O2 Pd2 Pd1 40.36(11) . . ? 
O1 Pd2 Pd1 40.28(11) . . ? 
O5 S1 O4 116.6(5) . . ? 
O5 S1 O3 112.7(3) . . ? 
O4 S1 O3 114.0(3) . . ? 
O5 S1 C21 104.0(4) . . ? 
O4 S1 C21 103.5(4) . . ? 
O3 S1 C21 103.9(3) . . ? 
O6 S2 O8 116.8(4) . . ? 
O6 S2 O7 115.7(5) . . ? 
O8 S2 O7 114.0(4) . . ? 
O6 S2 C22 103.1(6) . . ? 
O8 S2 C22 102.3(5) . . ? 
O7 S2 C22 101.8(6) . . ? 
Pd2 O1 Pd1 99.46(17) . . ? 
Pd2 O1 H6 116(4) . . ? 
Pd1 O1 H6 88(4) . . ? 
Pd2 O2 Pd1 99.37(18) . . ? 
Pd2 O2 H5 102(5) . . ? 
Pd1 O2 H5 104(5) . . ? 
C1 N1 C5 119.4(5) . . ? 
C1 N1 Pd1 125.5(4) . . ? 
C5 N1 Pd1 115.1(4) . . ? 
C10 N2 C6 119.2(5) . . ? 
C10 N2 Pd1 125.9(4) . . ? 
C6 N2 Pd1 114.9(4) . . ? 
C11 N3 C15 119.5(5) . . ? 
C11 N3 Pd2 125.7(4) . . ? 
C15 N3 Pd2 114.7(4) . . ? 
C16 N4 C20 119.7(5) . . ? 
C16 N4 Pd2 115.9(4) . . ? 
C20 N4 Pd2 124.4(4) . . ? 
N1 C1 C2 121.6(6) . . ? 
N1 C1 H1 119.2 . . ? 
C2 C1 H1 119.2 . . ? 
C1 C2 C3 119.7(6) . . ? 
C1 C2 H2 120.2 . . ? 
C3 C2 H2 120.2 . . ? 
C2 C3 C4 118.9(6) . . ? 
C2 C3 H3 120.6 . . ? 
C4 C3 H3 120.6 . . ? 
C5 C4 C3 119.5(6) . . ? 
C5 C4 H4 120.3 . . ? 
C3 C4 H4 120.3 . . ? 
N1 C5 C4 121.0(6) . . ? 
N1 C5 C6 113.4(5) . . ? 
C4 C5 C6 125.5(5) . . ? 
N2 C6 C7 120.9(6) . . ? 
N2 C6 C5 115.4(5) . . ? 
C7 C6 C5 123.7(5) . . ? 
C8 C7 C6 119.6(6) . . ? 
C8 C7 H7 120.2 . . ? 
C6 C7 H7 120.2 . . ? 
C7 C8 C9 119.2(6) . . ? 
C7 C8 H8 120.4 . . ? 
C9 C8 H8 120.4 . . ? 
C8 C9 C10 119.1(6) . . ? 
C8 C9 H9 120.4 . . ? 
C10 C9 H9 120.4 . . ? 
N2 C10 C9 122.0(6) . . ? 
N2 C10 H10 119.0 . . ? 
C9 C10 H10 119.0 . . ? 
N3 C11 C12 122.2(6) . . ? 
N3 C11 H11 118.9 . . ? 
C12 C11 H11 118.9 . . ? 
C11 C12 C13 118.7(6) . . ? 
C11 C12 H12 120.6 . . ? 
C13 C12 H12 120.6 . . ? 
C14 C13 C12 119.3(6) . . ? 
C14 C13 H13 120.4 . . ? 
C12 C13 H13 120.4 . . ? 
C13 C14 C15 120.9(6) . . ? 
C13 C14 H14 119.6 . . ? 
C15 C14 H14 119.6 . . ? 
N3 C15 C14 119.4(6) . . ? 
N3 C15 C16 115.1(5) . . ? 
C14 C15 C16 125.5(5) . . ? 
N4 C16 C17 120.7(6) . . ? 
N4 C16 C15 113.4(5) . . ? 
C17 C16 C15 125.9(6) . . ? 
C18 C17 C16 120.0(7) . . ? 
C18 C17 H17 120.0 . . ? 
C16 C17 H17 120.0 . . ? 
C17 C18 C19 119.0(7) . . ? 
C17 C18 H18 120.5 . . ? 
C19 C18 H18 120.5 . . ? 
C20 C19 C18 120.1(7) . . ? 
C20 C19 H19 119.9 . . ? 
C18 C19 H19 119.9 . . ? 
C19 C20 N4 120.5(6) . . ? 
C19 C20 H20 119.7 . . ? 
N4 C20 H20 119.7 . . ? 
F1 C21 F2 108.8(7) . . ? 
F1 C21 F3 108.4(7) . . ? 
F2 C21 F3 105.5(7) . . ? 
F1 C21 S1 111.6(5) . . ? 
F2 C21 S1 111.7(6) . . ? 
F3 C21 S1 110.7(6) . . ? 
F5 C22 F4 107.7(12) . . ? 
F5 C22 F6 106.7(12) . . ? 
F4 C22 F6 112.8(12) . . ? 
F5 C22 S2 115.0(11) . . ? 
F4 C22 S2 108.1(10) . . ? 
F6 C22 S2 106.6(8) . . ? 
  
loop_ 
 _geom_torsion_atom_site_label_1 
 _geom_torsion_atom_site_label_2 
 _geom_torsion_atom_site_label_3 
 _geom_torsion_atom_site_label_4 
 _geom_torsion 
 _geom_torsion_site_symmetry_1 
 _geom_torsion_site_symmetry_2 
 _geom_torsion_site_symmetry_3 
 _geom_torsion_site_symmetry_4 
 _geom_torsion_publ_flag 
N2 Pd1 Pd2 N4 0.8(3) . . . . ? 
N1 Pd1 Pd2 N4 -177.4(3) . . . . ? 
O1 Pd1 Pd2 N4 -173.2(3) . . . . ? 
O2 Pd1 Pd2 N4 -0.6(3) . . . . ? 
N2 Pd1 Pd2 N3 178.5(3) . . . . ? 
N1 Pd1 Pd2 N3 0.3(3) . . . . ? 
O1 Pd1 Pd2 N3 4.5(3) . . . . ? 
O2 Pd1 Pd2 N3 177.1(3) . . . . ? 
N2 Pd1 Pd2 O2 1.4(3) . . . . ? 
N1 Pd1 Pd2 O2 -176.8(3) . . . . ? 
O1 Pd1 Pd2 O2 -172.6(3) . . . . ? 
N2 Pd1 Pd2 O1 174.0(3) . . . . ? 
N1 Pd1 Pd2 O1 -4.2(3) . . . . ? 
O2 Pd1 Pd2 O1 172.6(3) . . . . ? 
N4 Pd2 O1 Pd1 78(2) . . . . ? 
N3 Pd2 O1 Pd1 -177.12(18) . . . . ? 
O2 Pd2 O1 Pd1 4.87(18) . . . . ? 
N2 Pd1 O1 Pd2 -71(2) . . . . ? 
N1 Pd1 O1 Pd2 177.29(18) . . . . ? 
O2 Pd1 O1 Pd2 -4.86(18) . . . . ? 
N4 Pd2 O2 Pd1 179.58(19) . . . . ? 
N3 Pd2 O2 Pd1 -119(5) . . . . ? 
O1 Pd2 O2 Pd1 -4.86(18) . . . . ? 
N2 Pd1 O2 Pd2 -179.06(18) . . . . ? 
N1 Pd1 O2 Pd2 116(4) . . . . ? 
O1 Pd1 O2 Pd2 4.86(18) . . . . ? 
N2 Pd1 N1 C1 -177.7(5) . . . . ? 
O1 Pd1 N1 C1 -1.6(5) . . . . ? 
O2 Pd1 N1 C1 -112(4) . . . . ? 
Pd2 Pd1 N1 C1 1.1(6) . . . . ? 
N2 Pd1 N1 C5 2.4(4) . . . . ? 
O1 Pd1 N1 C5 178.4(4) . . . . ? 
O2 Pd1 N1 C5 68(4) . . . . ? 
Pd2 Pd1 N1 C5 -178.9(3) . . . . ? 
N1 Pd1 N2 C10 176.4(5) . . . . ? 
O1 Pd1 N2 C10 64(2) . . . . ? 
O2 Pd1 N2 C10 -1.6(5) . . . . ? 
Pd2 Pd1 N2 C10 -2.5(6) . . . . ? 
N1 Pd1 N2 C6 -1.7(4) . . . . ? 
O1 Pd1 N2 C6 -114(2) . . . . ? 
O2 Pd1 N2 C6 -179.6(4) . . . . ? 
Pd2 Pd1 N2 C6 179.5(3) . . . . ? 
N4 Pd2 N3 C11 179.1(5) . . . . ? 
O2 Pd2 N3 C11 118(5) . . . . ? 
O1 Pd2 N3 C11 3.6(5) . . . . ? 
Pd1 Pd2 N3 C11 0.6(6) . . . . ? 
N4 Pd2 N3 C15 -1.5(4) . . . . ? 
O2 Pd2 N3 C15 -63(5) . . . . ? 
O1 Pd2 N3 C15 -177.0(4) . . . . ? 
Pd1 Pd2 N3 C15 -180.0(3) . . . . ? 
N3 Pd2 N4 C16 -0.7(4) . . . . ? 
O2 Pd2 N4 C16 177.4(4) . . . . ? 
O1 Pd2 N4 C16 105(2) . . . . ? 
Pd1 Pd2 N4 C16 177.8(3) . . . . ? 
N3 Pd2 N4 C20 -178.2(5) . . . . ? 
O2 Pd2 N4 C20 -0.1(5) . . . . ? 
O1 Pd2 N4 C20 -72(2) . . . . ? 
Pd1 Pd2 N4 C20 0.4(6) . . . . ? 
C5 N1 C1 C2 -0.1(9) . . . . ? 
Pd1 N1 C1 C2 179.9(4) . . . . ? 
N1 C1 C2 C3 1.5(10) . . . . ? 
C1 C2 C3 C4 -1.9(10) . . . . ? 
C2 C3 C4 C5 0.9(9) . . . . ? 
C1 N1 C5 C4 -1.0(8) . . . . ? 
Pd1 N1 C5 C4 179.0(4) . . . . ? 
C1 N1 C5 C6 177.4(5) . . . . ? 
Pd1 N1 C5 C6 -2.6(6) . . . . ? 
C3 C4 C5 N1 0.6(9) . . . . ? 
C3 C4 C5 C6 -177.7(5) . . . . ? 
C10 N2 C6 C7 1.2(8) . . . . ? 
Pd1 N2 C6 C7 179.4(4) . . . . ? 
C10 N2 C6 C5 -177.4(5) . . . . ? 
Pd1 N2 C6 C5 0.8(6) . . . . ? 
N1 C5 C6 N2 1.2(7) . . . . ? 
C4 C5 C6 N2 179.5(5) . . . . ? 
N1 C5 C6 C7 -177.4(5) . . . . ? 
C4 C5 C6 C7 0.9(9) . . . . ? 
N2 C6 C7 C8 -0.8(9) . . . . ? 
C5 C6 C7 C8 177.7(5) . . . . ? 
C6 C7 C8 C9 -0.5(10) . . . . ? 
C7 C8 C9 C10 1.2(10) . . . . ? 
C6 N2 C10 C9 -0.5(9) . . . . ? 
Pd1 N2 C10 C9 -178.4(5) . . . . ? 
C8 C9 C10 N2 -0.8(10) . . . . ? 
C15 N3 C11 C12 -2.8(9) . . . . ? 
Pd2 N3 C11 C12 176.6(4) . . . . ? 
N3 C11 C12 C13 1.3(10) . . . . ? 
C11 C12 C13 C14 0.9(10) . . . . ? 
C12 C13 C14 C15 -1.6(10) . . . . ? 
C11 N3 C15 C14 2.1(8) . . . . ? 
Pd2 N3 C15 C14 -177.4(4) . . . . ? 
C11 N3 C15 C16 -177.2(5) . . . . ? 
Pd2 N3 C15 C16 3.3(6) . . . . ? 
C13 C14 C15 N3 0.1(9) . . . . ? 
C13 C14 C15 C16 179.3(6) . . . . ? 
C20 N4 C16 C17 -0.4(9) . . . . ? 
Pd2 N4 C16 C17 -178.0(5) . . . . ? 
C20 N4 C16 C15 -179.8(5) . . . . ? 
Pd2 N4 C16 C15 2.6(6) . . . . ? 
N3 C15 C16 N4 -3.9(7) . . . . ? 
C14 C15 C16 N4 176.9(5) . . . . ? 
N3 C15 C16 C17 176.8(6) . . . . ? 
C14 C15 C16 C17 -2.5(10) . . . . ? 
N4 C16 C17 C18 -0.7(10) . . . . ? 
C15 C16 C17 C18 178.6(6) . . . . ? 
C16 C17 C18 C19 1.3(11) . . . . ? 
C17 C18 C19 C20 -0.8(11) . . . . ? 
C18 C19 C20 N4 -0.3(10) . . . . ? 
C16 N4 C20 C19 0.9(9) . . . . ? 
Pd2 N4 C20 C19 178.3(5) . . . . ? 
O5 S1 C21 F1 -64.7(7) . . . . ? 
O4 S1 C21 F1 57.7(8) . . . . ? 
O3 S1 C21 F1 177.1(6) . . . . ? 
O5 S1 C21 F2 57.3(7) . . . . ? 
O4 S1 C21 F2 179.7(6) . . . . ? 
O3 S1 C21 F2 -60.9(7) . . . . ? 
O5 S1 C21 F3 174.5(6) . . . . ? 
O4 S1 C21 F3 -63.1(6) . . . . ? 
O3 S1 C21 F3 56.3(6) . . . . ? 
O6 S2 C22 F5 -66.7(11) . . . . ? 
O8 S2 C22 F5 55.0(11) . . . . ? 
O7 S2 C22 F5 173.1(10) . . . . ? 
O6 S2 C22 F4 53.7(11) . . . . ? 
O8 S2 C22 F4 175.4(10) . . . . ? 
O7 S2 C22 F4 -66.6(11) . . . . ? 
O6 S2 C22 F6 175.3(9) . . . . ? 
O8 S2 C22 F6 -63.0(10) . . . . ? 
O7 S2 C22 F6 55.0(10) . . . . ? 
  
loop_ 
 _geom_hbond_atom_site_label_D 
 _geom_hbond_atom_site_label_H 
 _geom_hbond_atom_site_label_A 
 _geom_hbond_distance_DH 
 _geom_hbond_distance_HA 
 _geom_hbond_distance_DA 
 _geom_hbond_angle_DHA 
 _geom_hbond_site_symmetry_A 

C4 H4 O8  0.93 2.30 3.224(8) 171.5 1_556 
C7 H7 O8  0.93 2.44 3.362(9) 171.1 1_556 
C12 H12 O6  0.93 2.46 3.232(10) 140.2 1_455 
C11 H11 O3  0.93 2.66 3.496(8) 150.0 . 
C1 H1 O3  0.93 2.60 3.438(7) 150.1 . 
C1 H1 O4  0.93 2.52 3.221(8) 131.9 . 
O2 H5 O3  0.81(6) 2.01(6) 2.788(6) 161(6) 2_567 
O1 H6 O3  0.85(6) 2.33(6) 2.876(6) 122(5) . 
  
_diffrn_measured_fraction_theta_max    0.971 
_diffrn_reflns_theta_full              27.00 
_diffrn_measured_fraction_theta_full   0.971 
_refine_diff_density_max    1.684 
_refine_diff_density_min   -1.224 
_refine_diff_density_rms    0.153 
  
